# Supplementary material for: Measuring DNA content in live cells by fluorescence microscopy
Source: Cell Div. 2018 Sep 4;13:6. doi: 10.1186/s13008-018-0039-z (PMC6123973; doi:10.1186/s13008-018-0039-z)
Supplement: Supplementary file 2 — Additional file 2. ProcessDNA MATLAB file. [file 13008_2018_39_MOESM2_ESM.m]

function [DataSet] = ProcessDNA(MovieName,Thresh,MinSize,MaxSize,Pix2Mic,AviFlag)

%% This program segments the frames of the movie where a Threshold value is determined based
%% on the sharpest gradients in the image intensity weighted by the factor
%% Thresh. Objects smaller than MinSize are removed from the segmented image.
%% The program then determines where the nuclie
%% are in each frame and extracts the centerline of each.  

warning off
  DataSet = [];
  CellWidth = 30;
 
if AviFlag == 1
  
  MovieObj = VideoReader(MovieName);

Span = MovieObj.NumberOfFrames;
Height = MovieObj.Height;
Width = MovieObj.Width;

else

FullFrame = imread(MovieName,1);
[Height,Width] = size(FullFrame(:,:,1));
Span = 1;

end

    OutName = strcat('Tracked.',MovieName);
    AviOut = VideoWriter(OutName,'Uncompressed AVI');
    open(AviOut);
    [X,Y] = meshgrid((1:Width),(1:Height));
    
 for n = Span-3:Span
    
if AviFlag == 1
  
    FullFrame = read(MovieObj,n);
    Frame = double(FullFrame(:,:,3));

else

    FullFrame = imread(MovieName,n);
    Frame = double(FullFrame(:,:,1));

end

NewFrame = FullFrame;

    Frame = double(Frame(1:Height,1:Width));
    Frame = Frame - min(Frame(:));
    Frame = 256.*Frame./max(Frame(:));
    
    GradFrame = (   ( cshift2(Frame,[-1 0]) - cshift2(Frame,[1 0]) ).^2 ... 
                  + ( cshift2(Frame,[0 -1]) - cshift2(Frame,[0 1]) ).^2 );
                      
    Threshold = Thresh.*sum( GradFrame(:).*Frame(:) )./ sum(GradFrame(:));
    
    FrameA = Frame;
    FrameA(FrameA<=Threshold) = 0;
    FrameA(FrameA>Threshold) = 1;
    FrameA = bwareaopen(FrameA,MinSize);
    FrameA = imclearborder(FrameA);
    FrameA = imfill(FrameA,'holes');
    MeanI = mean(Frame(FrameA));
    StdI = std(Frame(FrameA));
    label = bwlabel(FrameA);
    Stats = regionprops(label,'Area','Perimeter','Eccentricity','MajorAxisLength','MinorAxisLength');

    h2 = gcf;
    
    for m = 1:max(label(:));
        
        Mask = sparse(label==m);
        
        if nnz(Mask) > MaxSize |  mean(Frame(Mask)) > MeanI + StdI;
           
        else
        
    xdata = X(Mask);
    ydata = Y(Mask);
    Intensity = Frame(Mask);
    Istd = std(Intensity)./mean(Intensity);
    Iint = sum(Intensity);
    IintStr = num2str(Iint./10^5,'%10.1f');
        
    Xcm = mean(xdata);
    Ycm = mean(ydata);

    Area = Stats(m).Area;
    P = Stats(m).Perimeter;
    
    Shape = 4.*pi.*Area./P.^2;
    
    NewFrame = insertMarker(NewFrame,[Xcm Ycm],'o','Size',6,'Color','white');
    NewFrame = insertMarker(NewFrame,[Xcm Ycm],'o','Size',7,'Color','white');
    NewFrame = insertMarker(NewFrame,[Xcm Ycm],'o','Size',8,'Color','white');
    NewFrame = insertText(NewFrame,[Xcm+8 Ycm-10],int2str(m),'FontSize',20,'TextColor','red','BoxOpacity',0,'AnchorPoint','LeftCenter');
    NewFrame = insertText(NewFrame,[Xcm+8 Ycm+10],IintStr,'FontSize',20,'TextColor','green','BoxOpacity',0,'AnchorPoint','LeftCenter');

    DataSet = [ DataSet;
                Xcm Ycm Area P Shape Iint Istd m n ];
            
        end
    
    end
    
    p.cdata = NewFrame;
    p.colormap = [];
    
    writeVideo(AviOut,p)
    
    figure(2);
    clf;
    imshow(NewFrame)
    
 q = find(DataSet(:,9)==n);
    
    figure
 hist(DataSet(q,6),30);
 xlabel('Integrated Intensity','FontName','TimesNewRoman','FontSize',20);
 ylabel('Frequency','FontName','TimesNewRoman','FontSize',20);
 num = int2str(n);
 GraphName = strcat('Histogram for Frame ',num);
 title(GraphName,'FontName','TimesNewRoman','FontSize',20);
    
 end
 

 %%%%%%%%%%%%%%%%%%%%%%%%%%%%%%%%%%%%%%%%%%%%%%%%%%%%%%%%%%%%%%%%%%%%%%%%%%%%%%%%
 
 %%% Subroutines
 
 %%%%%%%%%%%%%%%%%%%%%%%%%%%%%%%%%%%%%%%%%%%%%%%%%%%%%%%%%%%%%%%%%%%%%%%%%%%%%%%%
 
 function [B] = cshift2(A,compass)
[W,L] = size(A);
if compass(1)<0
    Iy = [-compass(1)+1:W 1:-compass(1)]; 
elseif compass(1)>0
    Iy = [W-compass(1)+1:W 1:W-compass(1)];
else
    Iy = (1:W); 
end
if compass(2)<0
    Ix = [-compass(2)+1:L 1:-compass(2)];
elseif compass(2)>0
    Ix = [L-compass(2)+1:L 1:L-compass(2)];
else
    Ix = (1:L);
end
B = A(Iy,Ix);
